# Supplementary material for: Young parents produce offspring with short telomeres: A study in a long-lived bird, the Black-browed Albatross (Thalassarche melanophrys)
Source: PubMed Central journal article supplement (PMC5862442; doi:10.1371/journal.pone.0193526), 2018-03-21
Supplement: pone.0193526.s001.pdf [file pone.0193526.s001.pdf]

1 **S1 file**

2 **Table A:** Generalized additive models (GAM) with smoothing splines were used to  
3 investigate the shape of the relationships for female and male offspring between our variables  
4 of interest (telomere length and SMI) and parental age. These preliminary analyses showed  
5 that both telomere length and SMI were linearly related to parental age.

6

| Variable of interest      | Chick's sex | Predictor variable | df   | F-value | p-value | %Devaince explained |
|---------------------------|-------------|--------------------|------|---------|---------|---------------------|
| Offspring telomere length | Female      | s(Age)             | 1    | 0.684   | 0.416   | 2.77                |
|                           | Male        | s(Age)             | 1    | 8.71    | 0.007   | 27.5                |
| Offspring body condition  | Female      | s(Age)             | 1.58 | 18.5    | < 0.001 | 58.7                |
|                           | Male        | s(Age)             | 1    | 0.173   | 0.681   | 0.746               |

7

8

9

10

11 **Table B:** LM models selection table based on the Akaike Information Criterion (AICc) to  
 12 determine the best models when investigating the influence of mean parental age, chick's sex  
 13 and year of sampling on offspring telomere length. Presence (+) or absence (-) for qualitative  
 14 effects, AICc computations and relative variable importance (Weight) are indicated for each  
 15 model. Best models are shown in bold. The  $r^2$  of the full model and the best-fitting model  
 16 were respectively 0.295 and 0.149; 0.290 and 0.282; 0.069 and 0.069 for offspring telomere  
 17 length, offspring body condition and offspring beak size.

*Offspring telomere length*

| Model          | Mean parental age | Year of sampling | Chick's sex | Mean parental age x year of sampling | Mean parental age x Chick's sex | Chick's sex x year of sampling | AICc        | deltaAICc    | Weight       |
|----------------|-------------------|------------------|-------------|--------------------------------------|---------------------------------|--------------------------------|-------------|--------------|--------------|
| Model 1        | +                 | +                |             |                                      |                                 |                                | 98.6        | 0.000        | 0.241        |
| <b>Model 2</b> | +                 |                  |             |                                      |                                 |                                | <b>98.7</b> | <b>0.050</b> | <b>0.235</b> |
| Model 3        | +                 | +                |             | +                                    |                                 |                                | 101.0       | 2.36         | 0.074        |
| Model 4        | +                 | +                | +           |                                      | +                               |                                | 101.0       | 2.37         | 0.074        |
| Model 5        | +                 |                  | +           |                                      |                                 |                                | 101.0       | 2.41         | 0.072        |
| Model 6        | +                 | +                | +           |                                      |                                 |                                | 101.2       | 2.57         | 0.067        |
| Model 7        | +                 |                  | +           |                                      | +                               |                                | 101.6       | 2.98         | 0.054        |
| Model 8        | +                 | +                | +           | +                                    | +                               |                                | 101.6       | 3.01         | 0.053        |
| Model 9        | +                 | +                | +           | +                                    | +                               | +                              | 102.3       | 3.65         | 0.039        |

*Offspring body condition*

| Model          | Mean parental age | Year of sampling | Chick's sex | Mean parental age x year of sampling | Mean parental age x Chick's sex | Chick's sex x year of sampling | AICc         | deltaAICc    | Weight       |
|----------------|-------------------|------------------|-------------|--------------------------------------|---------------------------------|--------------------------------|--------------|--------------|--------------|
| <b>Model 1</b> | +                 |                  | +           |                                      | +                               |                                | <b>794.8</b> | <b>0.000</b> | <b>0.606</b> |
| Model 2        | +                 | +                | +           |                                      | +                               |                                | 796.9        | 2.05         | 0.218        |
| Model 3        | +                 | +                | +           |                                      | +                               | +                              | 798.5        | 3.68         | 0.096        |
| Model 4        | +                 | +                |             |                                      |                                 |                                | 802.2        | 7.35         | 0.015        |
| Model 5        | +                 |                  |             |                                      |                                 |                                | 802.3        | 7.5          | 0.014        |
| Model 6        | +                 | +                | +           | +                                    | +                               |                                | 802.5        | 7.7          | 0.013        |
| Model 7        | +                 |                  | +           |                                      |                                 |                                | 802.7        | 7.82         | 0.012        |
| Model 8        | +                 | +                | +           |                                      |                                 |                                | 803.3        | 8.43         | 0.009        |
| Model 9        | +                 | +                | +           | +                                    | +                               | +                              | 804.8        | 9.97         | 0.004        |

18

*Offspring beak size*

| Model          | Mean parental age | Year of sampling | Chick's sex | Mean parental age x year of sampling | Mean parental age x Chick's sex | Chick's sex x year of sampling | AICc         | deltaAICc    | Weight       |
|----------------|-------------------|------------------|-------------|--------------------------------------|---------------------------------|--------------------------------|--------------|--------------|--------------|
| <b>Model 1</b> |                   |                  | +           |                                      |                                 |                                | <b>301.4</b> | <b>0.000</b> | <b>0.343</b> |
| Model 2        | +                 |                  | +           |                                      |                                 |                                | 303.1        | 1.74         | 0.144        |
| Model 3        |                   | +                | +           |                                      |                                 |                                | 303.4        | 2.04         | 0.123        |
| Model 4        |                   |                  |             |                                      |                                 |                                | 303.8        | 2.43         | 0.102        |
| Model 5        | +                 |                  |             |                                      |                                 |                                | 305.0        | 3.67         | 0.055        |
| Model 6        |                   | +                |             |                                      |                                 |                                | 305.2        | 3.87         | 0.049        |
| Model 7        | +                 | +                | +           |                                      |                                 |                                | 305.3        | 3.89         | 0.049        |
| Model 8        | +                 |                  | +           |                                      | +                               |                                | 305.5        | 4.18         | 0.042        |
| Model 9        |                   | +                | +           |                                      |                                 | +                              | 306.5        | 5.17         | 0.026        |
| Model 10       | +                 | +                | +           | +                                    | +                               | +                              | 314.5        | 13.17        | 0.000        |

19
