# Supplementary material for: Young parents produce offspring with short telomeres: A study in a long-lived bird, the Black-browed Albatross (Thalassarche melanophrys)
Source: PubMed Central journal article supplement (PMC5862442; doi:10.1371/journal.pone.0193526), 2018-03-21
Supplement: pone.0193526.s002.pdf [file pone.0193526.s002.pdf]

| Chick telomere length | Cohort | Parental mean age | Chick sex | Chick SMI |
|-----------------------|--------|-------------------|-----------|-----------|
| 9,57                  | 2011   | 12                | F         | 2513,54   |
| 8,04                  | 2011   | 12                | M         | 5075,15   |
| 9,25                  | 2011   | 12                | F         | 2944,71   |
| 8,51                  | 2011   | 10,5              | F         | 2815,48   |
| 8,95                  | 2011   | 16                | M         | 4110,43   |
| 7,95                  | 2011   | 11,5              | F         | 3208,09   |
| 8,70                  | 2011   | 11                | F         | 2979,19   |
| 8,44                  | 2011   | 21,5              | M         | 4789,40   |
| 9,43                  | 2011   | 17                | F         | 3741,07   |
| 10,18                 | 2011   | 12                | F         | 2804,67   |
| 8,64                  | 2011   | 12,5              | M         | 3397,57   |
| 9,30                  | 2011   | 24                | F         | 4527,96   |
| 10,90                 | 2011   | 22,5              | M         | 3664,47   |
| 10,20                 | 2011   | 14,5              | F         | 3971,91   |
| 10,98                 | 2011   | 25                | M         | 3397,57   |
| 9,42                  | 2013   | 11,5              | M         | 3223,31   |
| 9,40                  | 2013   | 10                | F         | 3458,34   |
| 9,15                  | 2013   | 13,5              | M         | 3825,28   |
| 9,03                  | 2012   | 16                | F         | 3758,71   |
| 9,58                  | 2012   | 22,5              | F         | 4914,88   |
| 9,17                  | 2012   | 13                | M         | 3029,58   |
| 9,86                  | 2012   | 17                | F         | 4691,72   |
| 9,38                  | 2012   | 11,5              | M         | 3480,74   |
| 8,96                  | 2012   | 13,5              | F         | 4339,31   |
| 9,82                  | 2012   | 13                | M         | 3446,84   |
| 9,13                  | 2012   | 12                | M         | 3985,69   |
| 9,12                  | 2012   | 15,5              | M         | 4375,25   |
| 9,59                  | 2012   | 15,5              | F         | 3498,93   |
| 8,94                  | 2012   | 22                | F         | 3972,55   |
| 8,94                  | 2012   | 11                | F         | 3092,67   |
| 10,67                 | 2012   | 22                | M         | 3261,37   |
| 9,62                  | 2012   | 11,5              | F         | 3384,23   |
| 9,98                  | 2012   | 11                | M         | 4125,80   |
| 9,42                  | 2012   | 13                | M         | 4098,26   |
| 9,49                  | 2012   | 14,5              | F         | 4190,08   |
| 10,26                 | 2012   | 22,5              | M         | 4504,48   |
| 8,86                  | 2013   | 11                | F         | 3554,08   |
| 9,45                  | 2013   | 28                | M         | 4264,34   |
| 8,97                  | 2013   | 16                | F         | 3886,11   |
| 9,39                  | 2013   | 15                | F         | 4426,01   |
| 9,56                  | 2013   | 28                | M         | 3653,02   |
| 8,40                  | 2013   | 19,5              | F         | 4284,10   |
| 9,49                  | 2013   | 12                | F         | 3634,30   |
| 8,81                  | 2013   | 13                | M         | 4609,57   |
| 9,22                  | 2013   | 24,5              | M         | 4905,26   |
| 8,96                  | 2013   | 12                | M         | 5310,33   |
| 9,32                  | 2013   | 19                | F         | 3936,89   |
| 9,91                  | 2013   | 22                | F         | 4293,95   |
| 8,08                  | 2013   | 7                 | M         | 3421,67   |

|      |      |    |   |         |
|------|------|----|---|---------|
| 8,37 | 2013 | 13 | M | 3832,67 |
| 9,20 | 2013 | 15 | M | 4603,16 |
